# Supplementary material for: Effects of home environmental, behavioural and domestic activities on the risk of home injuries in French adults: Results from a prospective study
Source: bioRxiv or medRxiv preprint supplement (doi:10.1101/2022.07.18.22277761), 2022-07-19
Supplement: Supplementary file [file media-1.pdf]

## Modelling steps for the study of associations in relation to the physical environment, activities and behaviours and home injuries

### Step 0

- Identify the main exposures of interest and confounding factors

$E = \{E_1, \dots, E_p\}$  are the set of exposures of interest: the physical environment, activities and behaviours that can potentially be associated with home injuries.

$D = \{D_1, D_2, D_3, D_4, D_5\}$  are the confounding factors forced into the models: gender, age, history of previous injury, self-perceived physical and mental health status.

$C = \{C_1, \dots, C_q\}$  are other confounding factors identified through *Directed Acyclic Graphs*.

### General model definition

$$\log(\mu_{ijk}) = \log(t_{ijk}) + D_{ijk1}\alpha_1 + D_{ijk2}\alpha_2 + D_{ijk3}\alpha_3 + D_{ijk4}\alpha_4 + C_{ijk1}\gamma_1 + \dots + C_{ijkq}\gamma_q + E_{ijk1}\beta_1 + E_{ijkq}\beta_q + b_k + b_{jk}, \quad (1)$$

where  $\mu_{ijk}$  is the expectation of the home injury incidence of multiple measurements of each of the households where the same individual has lived  $i$ , the individual  $j$ , belonging to the same household  $k$ ,  $b_k$  the random intercept of the household  $k$ ,  $b_{jk}$  the nested random intercept of individuals in the household,  $\log(t_{jk})$  is the term offset.

- Estimation of models for each factor: gender, age, history of previous injury, self-perceived physical and mental health status

- Estimation of  $p$  models containing a single exposure of interest without adjustment

- Estimation of  $q$  models containing a single factor without adjustment

### Step 1

- Estimation of  $q$  models containing a single confounder adjusted for gender, age, history of previous injury, self-perceived physical and mental health status

$$\log(\mu) = \log(t) + D_1 + D_2 + D_3 + D_4 + D_5 + C_1 + b, \quad (2)$$

⋮

$$\log(\mu) = \log(t) + D_1 + D_2 + D_3 + D_4 + D_5 + C_q + b.$$

- Selection of significant potential  $q^*$  confounders after Benjamini and Hochberg (BH) correction ( $P < 0.1$ ) adjusted for gender, age and history of previous injury.

- Estimation of a model containing  $q^*$  retained confounders adjusted for gender, age and history of previous injury, self-perceived physical and mental health status:

$$\log(\mu) = \log(t) + D_1 + D_2 + D_3 + D_4 + D_5 + C_1 + \dots + C_{q^*}. \quad (3)$$

- Parameter Estimation, Confidence Intervals (CI),  $P$ -value

- Estimation of  $p$  models containing a single exposure of interest adjusted for gender, age and history of previous injury

$$\log(\mu) = \log(t) + D_1 + D_2 + D_3 + D_4 + D_5 + E_1 + b, \quad (4)$$

⋮

$$\log(\mu) = \log(t) + D_1 + D_2 + D_3 + D_4 + D_5 + E_p + b.$$

- Selection of  $p^*$  significant potential confounders after BH correction ( $P < 0.1$ ) adjusted for gender, age, history of previous injury, self-perceived physical and mental health status.

**Step 2**

- Estimation of  $p^*$  models containing 1 single exposure adjusted for gender, age, history of previous injury, and the selected  $q^*$  confounders:

$$\log(\mu) = \log(t) + D_1 + D_2 + D_3 + D_4 + D_5 + C_1 + \dots + C_{q^*} + E_1 + b, \quad (5)$$

⋮

$$\log(\mu) = \log(t) + D_1 + D_2 + D_3 + D_4 + D_5 + C_1 + \dots + C_{q^*} + E_{p^*} + b.$$

- Selection of  $p^{**}$  significant BH-corrected exposures ( $P < 0.1$ ) adjusted for gender, age, history of previous injury, self-perceived physical and mental health status of the  $q^*$  confounders retained.

- Parameter estimates, CIs, adjusted  $P$ -value BH

**Step 3**

- Estimation of a model containing  $p^{**}$  exposures adjusted for gender, age, history of previous injury and the selected  $q^*$  confounders:

$$\log(\mu) = \log(t) + D_1 + D_2 + D_3 + D_4 + D_5 + C_1 + \dots + C_{q^*} + E_1 + \dots + E_{p^{**}} + b. \quad (6)$$

- Parameter estimate, CI,  $P$ -value  $< 0.1$ , Attributable fraction

In all models, in order to simplify the notations, when selecting for example the  $p^*$  factors from  $E_1, \dots, E_p$ , the exposures are reordered in such a way that the selected  $p^*$  exposures are placed first:  $E_1, \dots, E_{p^*}$ .
