# Supplementary material for: Effects of home environmental, behavioural and domestic activities on the risk of home injuries in French adults: Results from a prospective study
Source: bioRxiv or medRxiv preprint supplement (doi:10.1101/2022.07.18.22277761), 2022-07-19
Supplement: Supplementary file [file media-2.pdf]

| <b>Crude Models</b>                                          |              |                                 |                      |
|--------------------------------------------------------------|--------------|---------------------------------|----------------------|
| <i>(n = 6146, HI = 946)</i>                                  |              |                                 |                      |
|                                                              | <i>n (%)</i> | <b>RR (95% CI)</b>              | <i>p<sub>c</sub></i> |
| <b>Block 1: Adjustment variables</b>                         |              |                                 |                      |
| <b>Gender</b>                                                | 6146         |                                 |                      |
| Female (vs. male)                                            | (52)         | 1.02 (0.84 - 1.23)              | 0.852                |
| <b>Age (years)</b>                                           | 6146         |                                 |                      |
| 15-29 (vs. 30-49)                                            | (8)          | 1.04 (0.70 - 1.55)              | 0.706                |
| 50-74                                                        | (62)         | 0.88 (0.70 - 1.10)              | -                    |
| 75+                                                          | (4)          | 0.93 (0.55 - 1.54)              | -                    |
| <b>History of previous injury (12 last months)</b>           | 5301         |                                 |                      |
| Yes (vs. No)                                                 | (9)          | 1.95 (1.41 - 2.70)              | <b>0.004</b>         |
| <b>Self-perceived physical health</b>                        | 5811         |                                 |                      |
| Poor (1 to 4) (vs. 8 - 10)                                   | (8)          | 1.61 (1.14 - 2.25)              | 0.110                |
| Good (5 to 7)                                                | (38)         | 1.11 (0.91 - 1.37)              | -                    |
| <b>Self-perceived mental health</b>                          | 5813         |                                 |                      |
| Poor (1 to 4) (vs. 8 - 10)                                   | (6)          | 1.57 (1.08 - 2.29)              | 0.211                |
| Good (5 to 7)                                                | (33)         | 1.06 (0.86 - 1.31)              | -                    |
| <b>Level of educational attainment by age</b>                | 6132         |                                 |                      |
| High (vs. Low)                                               | (92)         | 1.54 (1.03 - 2.31)              | 0.148                |
| <b>Household income level</b>                                | 5510         |                                 |                      |
| High (vs. Middle)                                            | (45)         | 1.24 (1.00 - 1.53)              | 0.110                |
| Low                                                          | (10)         | 0.79 (0.55 - 1.14)              | -                    |
| <b>Living alone</b>                                          | 6098         |                                 |                      |
| Yes (vs. No)                                                 | (20)         | 1.36 (1.09 - 1.71)              | 0.066                |
| <b>Frequency of alcohol consumption</b>                      | 5918         |                                 |                      |
| 2 or more times a week (vs. <2 times a week)                 | (42)         | 1.17 (0.96 - 1.42)              | 0.314                |
| <b>Employment status</b>                                     | 6086         |                                 |                      |
| Unemployed, Homemakers or Retirees (vs. Students, Employees) | (51)         | 0.82 (0.67 - 1.00)              | 0.179                |
| <b>Block 2: Exposures of interest</b>                        |              | <i>(one model per variable)</i> |                      |
| <i>Household characteristics</i>                             |              |                                 |                      |
| <b>Year construction</b>                                     | 5383         |                                 |                      |
| <1900 (vs. ≥2000)                                            | (8)          | 1.39 (0.96 - 2.02)              | 0.285                |
| 1900-1949                                                    | (11)         | 1.36 (0.96 - 1.93)              | -                    |
| 1950-1979                                                    | (27)         | 1.07 (0.80 - 1.42)              | -                    |
| 1980-1999                                                    | (23)         | 0.95 (0.70 - 1.28)              | -                    |
| <b>House area</b>                                            | 6008         |                                 |                      |
| <50 vs. (90-129)                                             | (6)          | 1.38 (0.91 - 2.11)              | 0.699                |
| 50-89                                                        | (26)         | 1.06 (0.82 - 1.36)              | -                    |
| 130-169                                                      | (17)         | 1.06 (0.81 - 1.39)              | -                    |
| ≥170                                                         | (12)         | 1.16 (0.86 - 1.57)              | -                    |
| <b>Animals</b>                                               | 6033         |                                 |                      |

|                                                   |      |                    |       |
|---------------------------------------------------|------|--------------------|-------|
| Yes (vs. No)                                      | (43) | 1.14 (0.94 - 1.39) | 0.396 |
| <b>Heating</b>                                    | 5933 |                    |       |
| Individuel (vs. Collective)                       | (85) | 1.17 (0.85 - 1.61) | 0.560 |
| <b>Fireplace</b>                                  | 5883 |                    |       |
| Yes (vs. No)                                      | (15) | 0.87 (0.67 - 1.12) | 0.527 |
| <b>Date maintenance heating</b>                   | 4823 |                    |       |
| More than 1 year (vs. Less than 1 year)           | (11) | 0.98 (0.72 - 1.33) | 0.648 |
| More then 5 years                                 | (5)  | 1.26 (0.85 - 1.86) | -     |
| <b>Auxiliary heating</b>                          | 5885 |                    |       |
| Yes, regularly (vs. No, never)                    | (5)  | 1.13 (0.73 - 1.75) | 0.779 |
| Yes, sometimes                                    | (22) | 1.08 (0.86 - 1.35) | -     |
| <b>Date electrical renovation</b>                 | 5012 |                    |       |
| More than 40 years (vs. Less than 40 years)       | (3)  | 1.30 (0.75 - 2.25) | 0.560 |
| <b>Wires woven in the electrical installation</b> | 4431 |                    |       |
| Yes (vs. No)                                      | (2)  | 0.86 (0.49 - 1.52) | 0.699 |
| <b>Adapted logement (disabled people)</b>         | 5943 |                    |       |
| Yes (vs. No, it is not useful)                    | (6)  | 0.89 (0.60 - 1.32) | 0.852 |
| No, but it would be useful                        | (7)  | 1.01 (0.70 - 1.46) | -     |
| <b>Absence of smoke alarms</b>                    | 5801 |                    |       |
| Yes (vs. No)                                      | (20) | 0.91 (0.71 - 1.16) | 0.619 |
| <b>Balcony</b>                                    | 4146 |                    |       |
| Yes (vs. No)                                      | (30) | 0.76 (0.61 - 0.94) | 0.096 |
| <b>Weapon</b>                                     | 5961 |                    |       |
| Yes (vs. No)                                      | (18) | 1.11 (0.88 - 1.41) | 0.571 |
| <b>Parquet on the kitchen floor</b>               | 5856 |                    |       |
| Yes (vs. No)                                      | (5)  | 1.18 (0.76 - 1.82) | 0.619 |
| <b>Linoleum on the kitchen floor</b>              | 5854 |                    |       |
| Yes (vs. No)                                      | (11) | 1.09 (0.80 - 1.48) | 0.699 |
| <b>Tile on the kitchen floor</b>                  | 5923 |                    |       |
| Yes (vs. No)                                      | (82) | 0.93 (0.71 - 1.22) | 0.699 |
| <b>Tapis on the room</b>                          | 6142 |                    |       |
| Yes (vs. No)                                      | (34) | 1.16 (0.95 - 1.42) | 0.110 |
| <b>Cable phone in the room</b>                    | 6142 |                    |       |
| Yes (vs. No)                                      | (47) | 1.26 (1.04 - 1.53) | 0.370 |
| <b>Not easy access to the lights from the bed</b> | 5726 |                    |       |
| Yes (vs. No)                                      | (6)  | 0.86 (0.55 - 1.36) | 0.686 |
| <b>Low-light lamp in the room</b>                 | 5875 |                    |       |
| Yes (vs. No)                                      | (5)  | 1.40 (0.95 - 2.08) | 0.283 |
| <b>Tiling on the living room or room floor</b>    | 5870 |                    |       |
| Yes (vs. No)                                      | (61) | 1.08 (0.88 - 1.33) | 0.619 |
| <b>Linoleum on the living room or room floor</b>  | 5826 |                    |       |

|                                                 |      |                    |       |
|-------------------------------------------------|------|--------------------|-------|
| Yes (vs. No)                                    | (21) | 0.93 (0.73 - 1.18) | 0.687 |
| <b>Carpet on the living room or room floor</b>  | 5795 |                    |       |
| Yes (vs. No)                                    | (16) | 1.15 (0.90 - 1.48) | 0.522 |
| <b>Parquet on the living room or room floor</b> | 5889 |                    |       |
| Yes (vs. No)                                    | (67) | 1.20 (0.97 - 1.49) | 0.283 |
| <b>Bathtub</b>                                  | 5927 |                    |       |
| Yes (vs. No)                                    | (68) | 1.10 (0.89 - 1.36) | 0.571 |
| <b>Shower</b>                                   | 5930 |                    |       |
| Yes (vs. No)                                    | (67) | 0.91 (0.74 - 1.12) | 0.560 |
| <b>Linoleum on the bathroom floor</b>           | 5864 |                    |       |
| Yes (vs. No)                                    | (15) | 1.14 (0.88 - 1.49) | 0.560 |
| <b>Tiles on the bathroom floor</b>              | 5937 |                    |       |
| Yes (vs. No)                                    | (79) | 0.88 (0.69 - 1.12) | 0.539 |
| <b>Attic</b>                                    | 5910 |                    |       |
| Yes (vs. No)                                    | (33) | 1.13 (0.92 - 1.38) | 0.497 |
| <b>Cellar</b>                                   | 5862 |                    |       |
| Yes (vs. No)                                    | (44) | 1.18 (0.97 - 1.43) | 0.285 |
| <b>Stairs</b>                                   | 5953 |                    |       |
| Yes (vs. No)                                    | (58) | 1.32 (1.08 - 1.62) | 0.066 |
| <b>Ramped stairs</b>                            | 123  |                    |       |
| All of them (vs. None of them)                  | (56) | 1.02 (0.70 - 1.49) | 0.699 |
| Some of them                                    | (10) | 1.23 (0.76 - 2.01) | -     |
| <b>No lighting stairs</b>                       | 138  |                    |       |
| None of them (vs. All of them)                  | (2)  | 1.07 (0.45 - 2.51) | 0.571 |
| Some of them                                    | (1)  | 1.94 (0.77 - 4.91) | -     |
| <b>No antislip stairs</b>                       | 149  |                    |       |
| None of them (vs. All of them)                  | (65) | 1.72 (1.06 - 2.78) | 0.179 |
| Some of them                                    | (5)  | 1.20 (0.59 - 2.46) | -     |
| <b>Garage, box or hut garden</b>                | 5097 |                    |       |
| Yes (vs. No)                                    | (75) | 0.85 (0.62 - 1.16) | 0.539 |
| <b>Sharp objects</b>                            | 2419 |                    |       |
| Yes (vs. No)                                    | (71) | 0.70 (0.52 - 0.96) | 0.127 |
| <b>Toxic dangers</b>                            | 2028 |                    |       |
| Yes (vs. No)                                    | (55) | 0.90 (0.70 - 1.17) | 0.613 |
| <b>Heavy dangers</b>                            | 2258 |                    |       |
| Yes (vs. No)                                    | (61) | 1.08 (0.82 - 1.41) | 0.699 |
| <b>Irritating dangers</b>                       | 1789 |                    |       |
| Yes (vs. No)                                    | (46) | 0.85 (0.66 - 1.09) | 0.446 |
| <b>Flammable hazards</b>                        | 2122 |                    |       |
| Yes (vs. No)                                    | (59) | 0.95 (0.73 - 1.25) | 0.779 |
| <b>Explosive hazards</b>                        | 1058 |                    |       |
| Yes (vs. No)                                    | (15) | 1.05 (0.79 - 1.40) | 0.779 |
| <b>Corrosive hazards</b>                        | 1591 |                    |       |
| Yes (vs. No)                                    | (38) | 0.88 (0.69 - 1.13) | 0.539 |

|                                                                |      |                           |              |
|----------------------------------------------------------------|------|---------------------------|--------------|
| <b>Ladders</b>                                                 | 2236 |                           |              |
| Yes (vs. No)                                                   | (64) | 0.74 (0.56 - 0.97)        | 0.138        |
| <b>Electric tools</b>                                          | 2532 |                           |              |
| Yes (vs. No)                                                   | (74) | 0.65 (0.47 - 0.88)        | 0.066        |
| <b>Manuals tools</b>                                           | 2750 |                           |              |
| Yes (vs. No)                                                   | (80) | 0.67 (0.47 - 0.94)        | 0.110        |
| <b>Outdoor space (N=4,646)</b>                                 | 5931 |                           |              |
| Yes, for personal use (vs. No)                                 | (70) | 1.30 (0.99 - 1.73)        | 0.388        |
| Yes, as a communal area (vs. No)                               | (9)  | 1.32 (0.88 - 1.98)        | -            |
| <b>Lawn mower</b>                                              | 3207 |                           |              |
| Yes (vs. No)                                                   | (64) | 1.15 (0.89 - 1.48)        | 0.539        |
| <b>Barbecue</b>                                                | 3177 |                           |              |
| Yes (vs. No)                                                   | (59) | 1.11 (0.88 - 1.41)        | 0.571        |
| <b>Uneven ground</b>                                           | 3207 |                           |              |
| Yes (vs. No)                                                   | (16) | 1.22 (0.94 - 1.59)        | 0.344        |
| <b>Water source (including pools)</b>                          | 3451 |                           |              |
| Yes (vs. No)                                                   | (68) | 0.87 (0.69 - 1.10)        | 0.497        |
| <b><i>Individual activities and behaviors</i></b>              |      |                           |              |
| <b>DIY</b>                                                     | 6627 |                           |              |
| Occasional (vs. Never)                                         | (29) | 1.30 (1.05 - 1.62)        | 0.111        |
| Frequent                                                       | (11) | 1.41 (1.05 - 1.88)        | -            |
| <b>Gardening</b>                                               | 5662 |                           |              |
| Occasional (vs. Never)                                         | (34) | 1.26 (1.02 - 1.57)        | 0.151        |
| Frequent                                                       | (13) | 1.35 (1.03 - 1.79)        | -            |
| <b>Domestic activities</b>                                     | 5550 |                           |              |
| Occasional (vs. Never)                                         | (53) | 1.45 (1.12 - 1.88)        | 0.112        |
| Frequent                                                       | (19) | 1.36 (1.00 - 1.86)        | -            |
| <b>Decanting cleaning products from the original packaging</b> | 5951 |                           |              |
| Yes (vs. No)                                                   | (16) | <b>1.53 (1.20 - 1.95)</b> | <b>0.014</b> |
| <b>Using a chair to reach high places</b>                      | 5914 |                           |              |
| Yes (vs. No)                                                   | (38) | 1.32 (1.09 - 1.60)        | 0.066        |
| <b>Using a ladder to reach high places</b>                     | 5927 |                           |              |
| Yes (vs. No)                                                   | (67) | 0.97 (0.79 - 1.20)        | 0.852        |
| <b>Using a small ladder to reach high places</b>               | 5917 |                           |              |
| Yes (vs. No)                                                   | (43) | 1.18 (0.97 - 1.43)        | 0.283        |
| <b>Using a stool to reach high places</b>                      | 5891 |                           |              |
| Yes (vs. No)                                                   | (23) | <b>1.50 (1.22 - 1.86)</b> | <b>0.006</b> |
